# Supplementary material
Source: PubMed Central journal article supplement (PMC4604028)
Supplement: NIHMS700049-supplement-01.pdf [file NIHMS700049-supplement-01.pdf]

364 Supplementary Table A: Baseline characteristics of the bortezomib-MUD vs. MMUD/MMRD  
365 cohorts

366 Supplementary Table B: Baseline characteristics of the bortezomib-MUD/MMUD/MMRD vs.  
367 Tac/Mtx MUD control cohort

368 Supplementary Table C: Outcomes of the bortezomib-MUD/MMUD/MMRD vs. Tac/Mtx MUD  
369 control cohort

382 Supplementary Figure 1: Cumulative incidence curves of grade II-IV acute GVHD and of relapse  
383 or death without developing grade II-IV acute GVHD, between the bortezomib-  
384 MUD/MMUD/MMRD vs. Tac/Mtx MUD control cohort

ACCEPTED MANUSCRIPT

388 Supplementary Table A

| Bortezomib-treated cohorts          | 7/8 MMUD/RD |    | 8/8 MUD     |      | 7/8 vs.<br>8/8<br>p-value |
|-------------------------------------|-------------|----|-------------|------|---------------------------|
|                                     | N=20        |    | N=14        |      |                           |
|                                     | N           | %  | N           | %    |                           |
| Age, median (range)                 | 49 (21, 60) |    | 49 (29, 60) |      | >0.99                     |
| Age ≥ 50                            | 10          | 50 | 6           | 42.9 | 0.74                      |
| Patient Sex                         |             |    |             |      | 0.49                      |
| M                                   | 7           | 35 | 7           | 50   |                           |
| F                                   | 13          | 65 | 7           | 50   |                           |
| Donor Sex                           |             |    |             |      | 0.5                       |
| M                                   | 10          | 50 | 9           | 64.3 |                           |
| F                                   | 10          | 50 | 5           | 35.7 |                           |
| Male Patient & Female Dnr           | 2           | 10 | 2           | 14.3 | >0.99                     |
| Diagnosis                           |             |    |             |      | 0.38                      |
| AML                                 | 11          | 55 | 6           | 42.9 |                           |
| CML                                 |             |    | 1           | 7.1  |                           |
| MM/PCD                              | 1           | 5  |             |      |                           |
| ALL                                 | 2           | 10 |             |      |                           |
| MDS                                 | 2           | 10 | 4           | 28.6 |                           |
| MPD                                 | 1           | 5  | 2           | 14.3 |                           |
| NHL                                 | 3           | 15 | 1           | 7.1  |                           |
| Patient or Donor CMV seropositivity |             |    |             |      | 0.63                      |
| Yes                                 | 18          | 90 | 11          | 78.6 |                           |

389

|                    |    |    |    |      |      |
|--------------------|----|----|----|------|------|
| Disease Risk Index |    |    |    |      | 0.45 |
| Low                |    |    | 1  | 7.1  |      |
| Intermediate       | 14 | 70 | 10 | 71.4 |      |
| High               | 6  | 30 | 3  | 21.4 |      |
| HCT - CI           |    |    |    |      |      |
| 0                  | 8  | 40 | 7  | 50   | 0.41 |
| 1-2                | 7  | 35 | 2  | 14.3 |      |
| ≥3                 | 5  | 25 | 5  | 35.7 |      |

390

391

392 Supplementary Table B

393

| Bortezomib-treated and control cohorts | Protocol 11-007<br>(Bort/Tac/MTX) |      | Control cohort<br>(Tac/MTX) |      | p-value |
|----------------------------------------|-----------------------------------|------|-----------------------------|------|---------|
|                                        | N                                 | %    | N                           | %    |         |
| Total                                  | 34                                | 100  | 45                          | 100  |         |
| Age, median (range)                    | 49 (21, 60)                       |      | 44 (22, 60)                 |      | 0.02    |
| Age ≥ 50                               | 16                                | 47.1 | 13                          | 28.9 | 0.11    |
| Patient Sex                            |                                   |      |                             |      | 0.65    |
| M                                      | 14                                | 41.2 | 21                          | 46.7 |         |
| F                                      | 20                                | 58.8 | 24                          | 53.3 |         |
| Donor Sex                              |                                   |      |                             |      | 0.65    |
| M                                      | 19                                | 55.9 | 28                          | 62.2 |         |
| F                                      | 15                                | 44.1 | 17                          | 37.8 |         |
| Male Patient & Female Dnr              | 4                                 | 11.8 | 3                           | 6.7  | 0.46    |
| PBSC Graft                             | 34                                | 100  | 45                          | 100  | NA      |
| HLA type (at A, B, C, DRB1)            |                                   |      |                             |      | <0.001  |
| 8/8 MUD                                | 14                                | 41.2 | 45                          | 100  |         |
| 7/8 URD/RD                             | 20                                | 58.8 |                             |      |         |
| Diagnosis                              |                                   |      |                             |      | 0.26    |
| AML                                    | 17                                | 50   | 19                          | 42.2 |         |
| CLL/SLL/PLL                            |                                   |      | 1                           | 2.2  |         |
| CML                                    | 1                                 | 2.9  | 2                           | 4.4  |         |
| MM/PCD                                 | 1                                 | 2.9  |                             |      |         |
| ALL                                    | 2                                 | 5.9  | 11                          | 24.4 |         |
| MDS                                    | 6                                 | 17.6 | 4                           | 8.9  |         |
| MPD                                    | 3                                 | 8.8  | 1                           | 2.2  |         |
| Mixed MDS/MPD                          |                                   |      | 1                           | 2.2  |         |
| NHL                                    | 4                                 | 11.8 | 6                           | 13.3 |         |
| Patient or Donor CMV seropositive      |                                   |      |                             |      | 0.4     |
| Yes                                    | 29                                | 85.3 | 34                          | 75.6 |         |
| Disease Risk Index                     |                                   |      |                             |      | 0.62    |
| Low/Intermediate                       | 25                                | 73.5 | 30                          | 66.7 |         |
| High/Very High                         | 9                                 | 26.5 | 15                          | 33.3 |         |
| HCT - CI                               |                                   |      |                             |      | 0.55    |
| 0                                      | 15                                | 44.1 | 18                          | 40   |         |
| 1-2                                    | 9                                 | 26.5 | 17                          | 37.8 |         |
| ≥ 3                                    | 10                                | 29.4 | 10                          | 22.2 |         |

394 Supplementary Table C

| Bortezomib-treated vs. Control cohorts | Protocol 11-007                   |                               |                      | Control *<br>(D)<br>(N=45) | p-value    |            |
|----------------------------------------|-----------------------------------|-------------------------------|----------------------|----------------------------|------------|------------|
|                                        | 8/8<br>MUD<br>(A)<br>(N=14)       | 7/8<br>UD/RD<br>(B)<br>(N=20) | All<br>(C)<br>(N=34) |                            | C vs.<br>D | B vs.<br>D |
|                                        | Cum Inc of D180 grade II-IV aGVHD | 29%                           | 45%                  |                            | 38%        | 56%        |
| Cum Inc of D180 grade III-IV aGVHD     | 7%                                | 15%                           | 12%                  | 27%                        | 0.07       | 0.26       |
| 1-year Cum Inc of cGVHD                | 57%                               | 45%                           | 50%                  | 40%                        | 0.42       | 0.8        |
| 1-year Cum Inc of Extensive cGVHD      | 43%                               | 40%                           | 41%                  | 40%                        | 0.69       | 0.86       |
| 2-year Cum Inc of NRM                  | 14%                               | 15%                           | 15%                  | 11%                        | 0.41       | 0.32       |
| 2-year Cum Inc of Relapse              | 0%                                | 26%                           | 15%                  | 27%                        | 0.16       | 0.77       |
| 2-year Progression-free Survival       | 86%                               | 59%                           | 70%                  | 62%                        | 0.52       | 0.65       |
| 2-year Overall Survival                | 86%                               | 61%                           | 71%                  | 64%                        | 0.57       | 0.63       |

\* 8/8 MUD and Tac/Mtx only. HSCT period: 2010-2012

395

421 Supplementary Figure 1

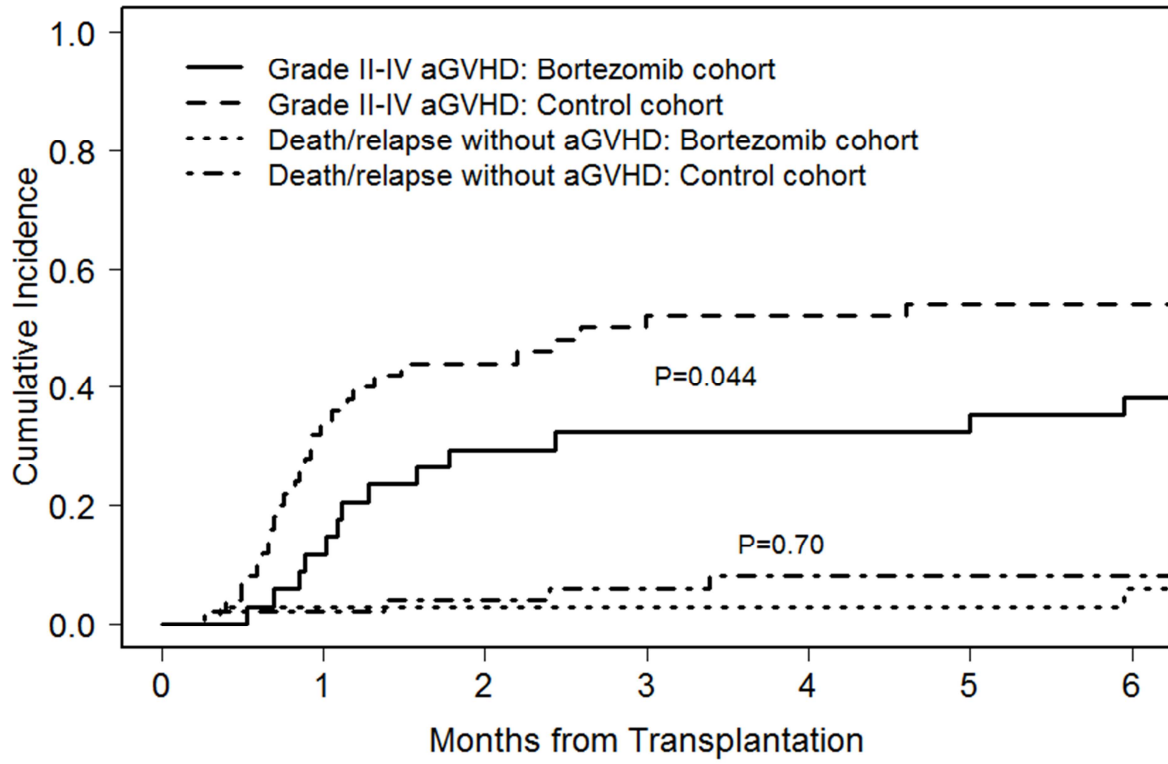

422

ACCEPTED
